# Supplementary material for: Prevalence of Subclinical Coronary Artery Atherosclerosis in the General Population
Source: PubMed Central journal article supplement (PMC8448414; doi:10.1161/circulationaha.121.055340), 2021-09-21

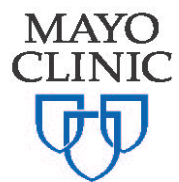

200 First Street SW  
Rochester, MN 55905  
(507) 284-3335  
**Scientific Publications**

*Rosemary Perry*

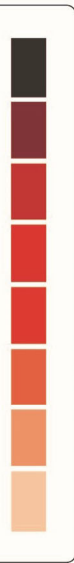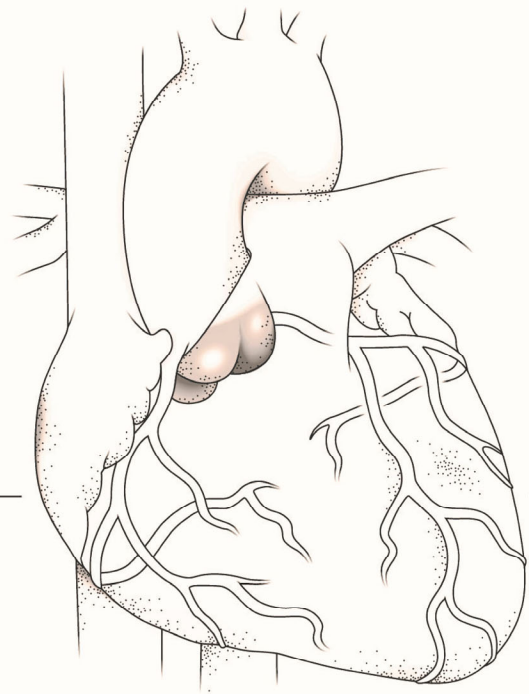

**MEN**

**WOMEN**

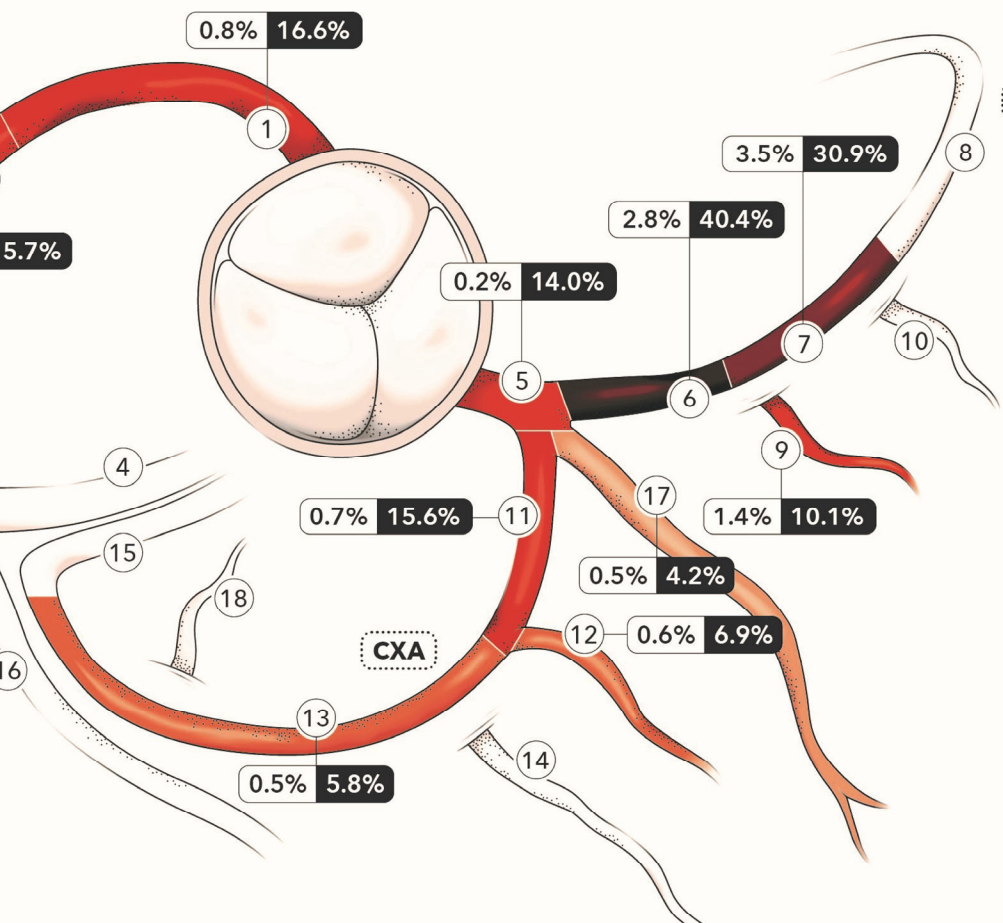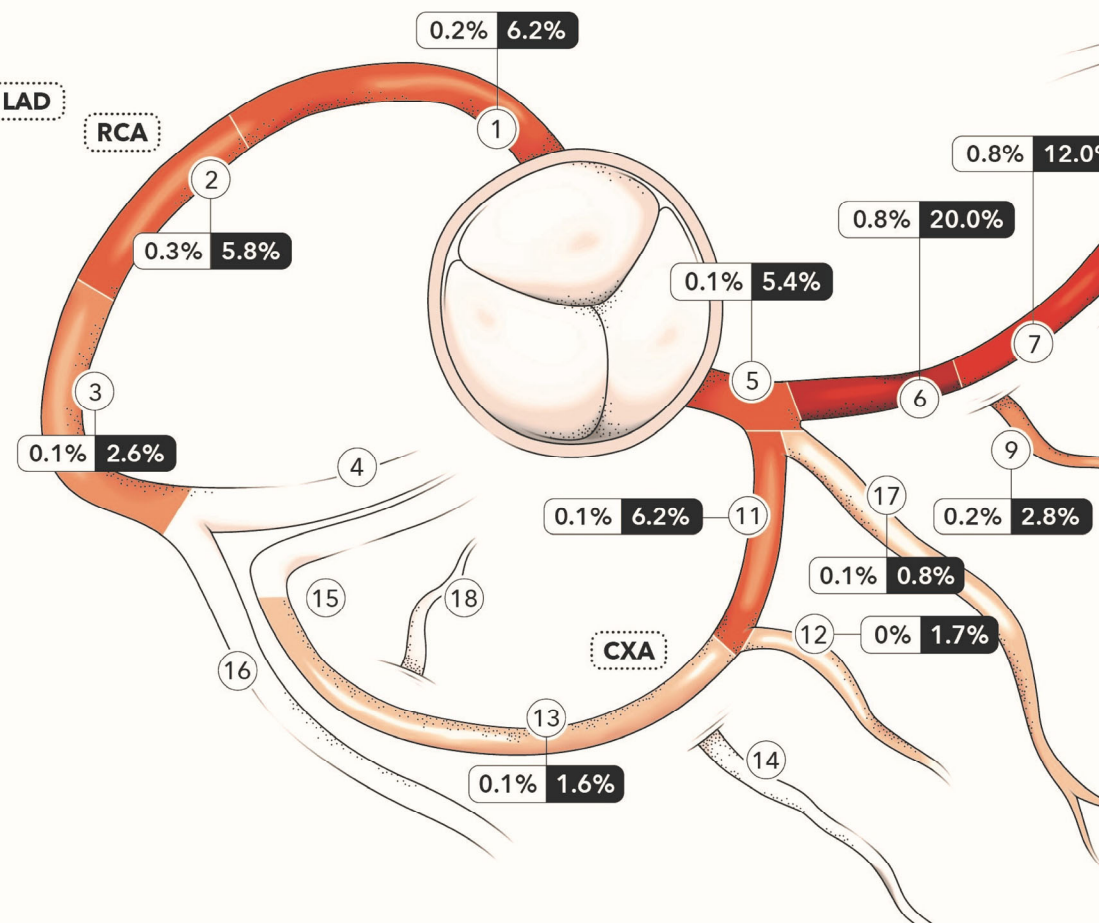

Supplement: cir-144-916-s002.pdf [file cir-144-916-s002.pdf]
